# Supplementary material
Source: MDPI journal article supplement (https://www.mdpi.com/2073-4352/4/1/64)
Supplement: s1 [file s1]

# Supporting Information

## 1. Powder X-Ray Diffraction Data for 2 and 3

**Figure S1.** Powder X-ray diffraction pattern of  $(\text{thbH})_3(\text{H}_3\text{O})[\text{W}_{10}\text{O}_{32}](\text{H}_2\text{O})_{7.5}$  (**2**). (Mo-K $\alpha$  radiation,  $\lambda = 0.7107 \text{ \AA}$ ).

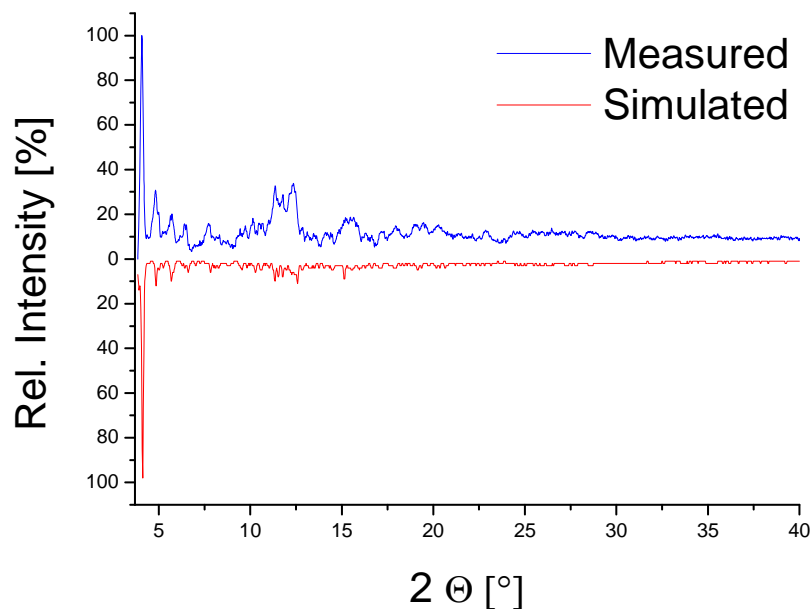

**Figure S2.** Powder X-ray diffraction pattern of  $(\text{thbH})_2[\text{W}_6\text{O}_{19}](\text{H}_2\text{O})_2$ . (Cu-K $\alpha$  radiation,  $\lambda = 1.5406 \text{ \AA}$ ).

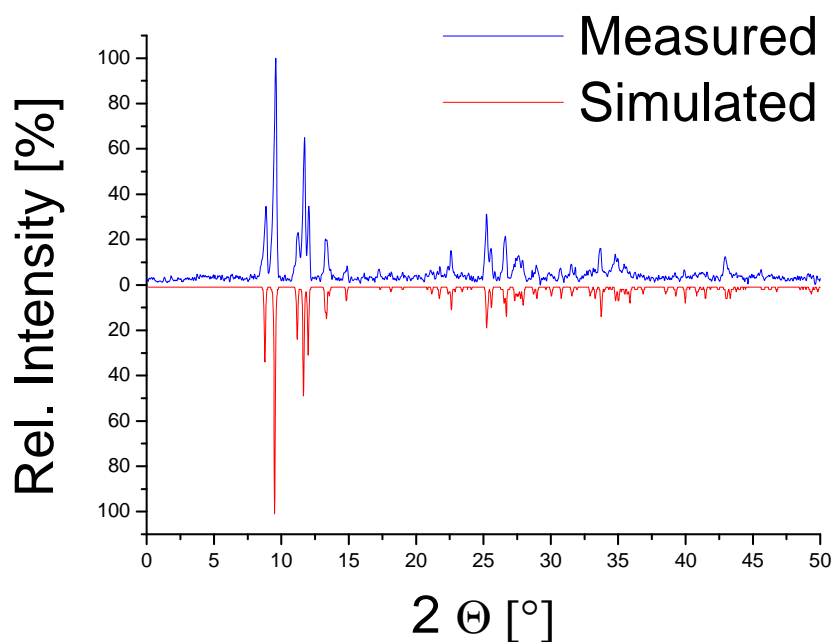

## 2. DTA/TG-Measurements of 2 and 3

**Figure S3.** DTA/TG of  $(\text{thbH})_3(\text{H}_3\text{O})[\text{W}_{10}\text{O}_{32}](\text{H}_2\text{O})_{7.5}$  (**2**).

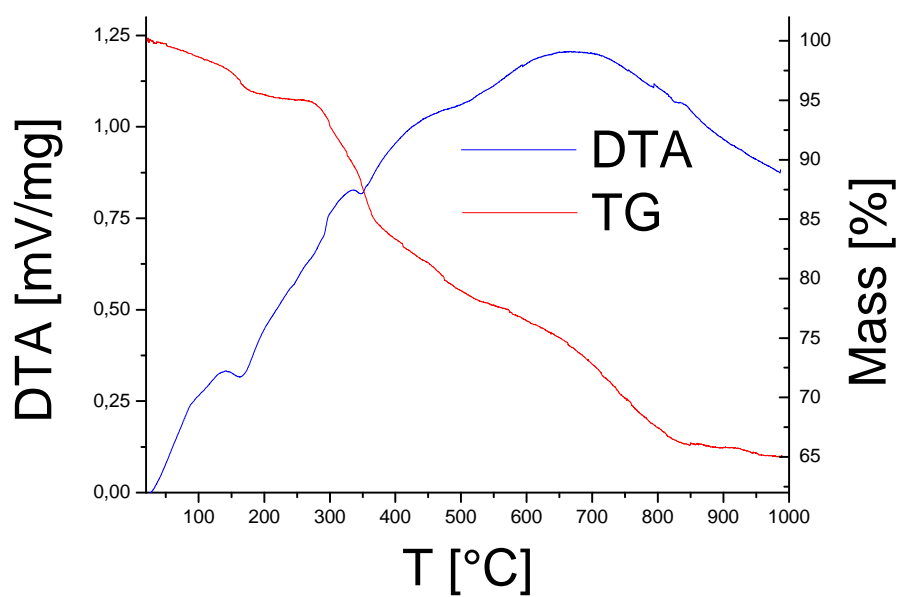

**Figure S4.** DTA/TG of  $(\text{thbH})_2[\text{W}_6\text{O}_{19}](\text{H}_2\text{O})_2$  (**3**).

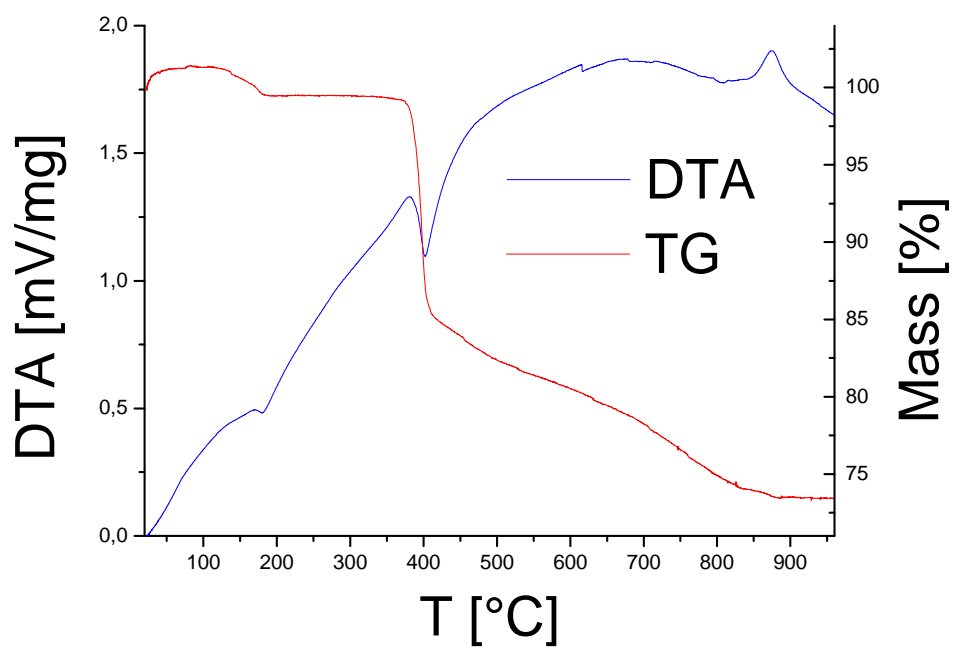

### 3. Powder X-Ray Diffraction Data for Thermolysis Residues of 2 and 3

**Figure S5.** X-ray powder pattern of the DTA residue of  $(\text{thbH})_3(\text{H}_3\text{O})[\text{W}_{10}\text{O}_{32}](\text{H}_2\text{O})_2$  (**2**) labeled **R2**. (Cu- $K_\alpha$  radiation,  $\lambda = 1.5406 \text{ \AA}$ ) [1,2].

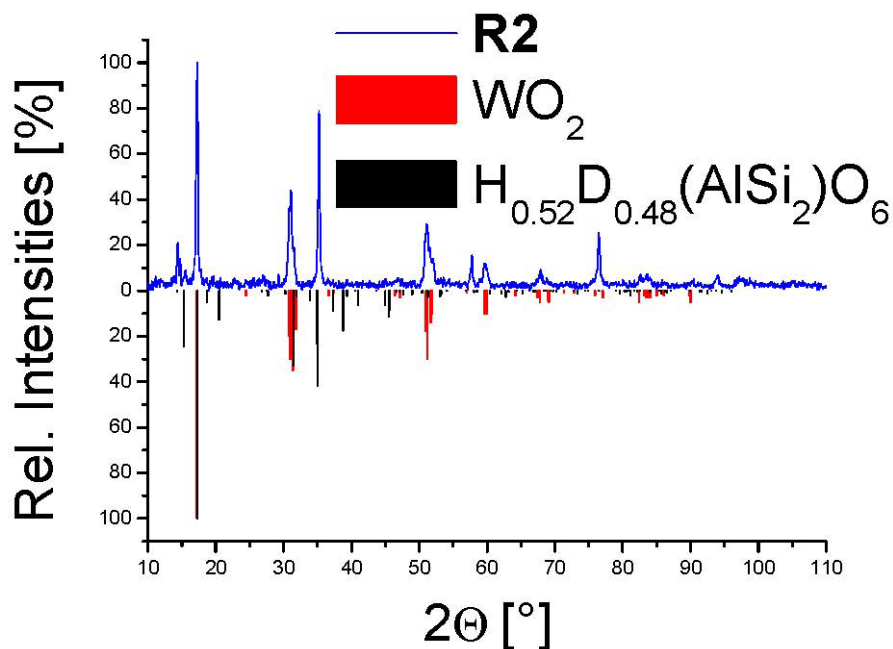

**Figure S6.** X-ray powder pattern of the DTA residue of  $(\text{thbH})_2[\text{W}_6\text{O}_{19}](\text{H}_2\text{O})_2$  (**3**) labeled **R3**. (Cu- $K_\alpha$  radiation,  $\lambda = 1.5406 \text{ \AA}$ ) [1].

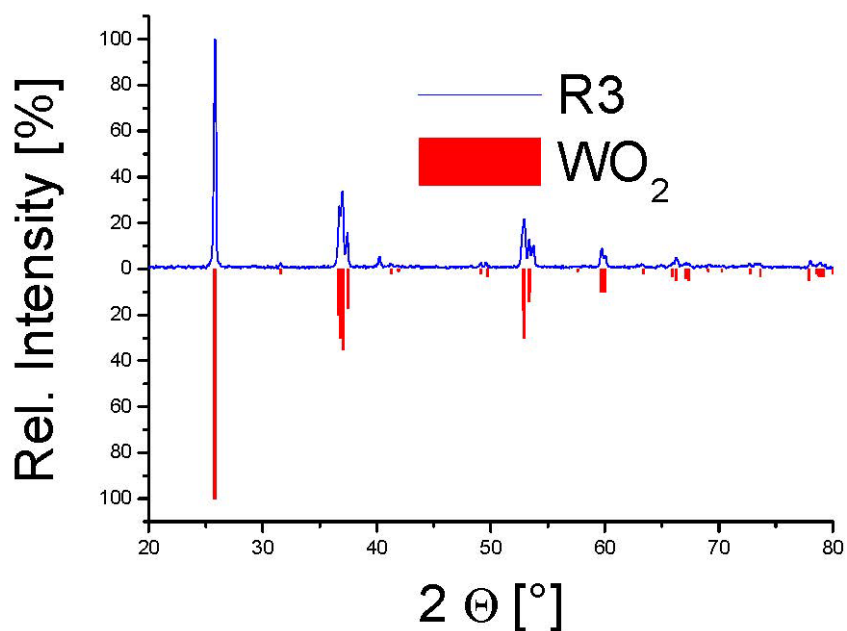

## 4. Hydrogen Bond Geometry Tables

**Table S1.** Hydrogen-bond geometry of the compound (GuaH)<sub>4</sub>[W<sub>10</sub>O<sub>32</sub>](H<sub>2</sub>O)<sub>4</sub> (**1**) (Å, °).

| <i>D</i> – <i>H</i> ··· <i>A</i> | <i>D</i> – <i>H</i> | <i>H</i> ··· <i>A</i> | <i>D</i> ··· <i>A</i> | <i>D</i> – <i>H</i> ··· <i>A</i> |
|----------------------------------|---------------------|-----------------------|-----------------------|----------------------------------|
| N1–H1···O1W                      | 0.88                | 1.91                  | 2.786 (17)            | 170.8                            |
| N2–H2A···O3W <sup>i</sup>        | 0.88                | 2.57                  | 3.27 (3)              | 137.1                            |
| N2–H2A···N1A <sup>i</sup>        | 0.88                | 2.39                  | 3.27 (4)              | 173.2                            |
| N2–H2B···O2WA                    | 0.88                | 2.21                  | 2.89 (3)              | 133.5                            |
| N7–H7···O3W                      | 0.88                | 1.75                  | 2.49 (3)              | 139.8                            |
| N7–H7···O2WB <sup>ii</sup>       | 0.88                | 2.35                  | 3.21 (4)              | 164.2                            |
| N9–H9···O16G <sup>iii</sup>      | 0.88                | 1.91                  | 2.77 (3)              | 165.6                            |
| C8–H8···O1 <sup>iv</sup>         | 0.95                | 2.31                  | 3.05 (2)              | 133.6                            |
| N11–H11···O2 <sup>v</sup>        | 0.88                | 2.10                  | 2.927 (18)            | 157.2                            |
| N12–H12A···O12 <sup>vi</sup>     | 0.88                | 2.65                  | 3.31 (2)              | 133.2                            |
| N12–H12A···N1A <sup>vii</sup>    | 0.88                | 2.54                  | 3.01 (4)              | 114.6                            |
| N12–H12B···O2 <sup>v</sup>       | 0.88                | 2.41                  | 3.16 (2)              | 143.2                            |
| N12–H12B···O1 <sup>v</sup>       | 0.88                | 2.63                  | 3.355 (19)            | 141.0                            |
| N17–H17···O6G <sup>v</sup>       | 0.88                | 1.91                  | 2.774 (16)            | 166.2                            |
| N19–H19···O14 <sup>viii</sup>    | 0.88                | 2.53                  | 2.980 (15)            | 112.8                            |
| N19–H19···N13 <sup>ix</sup>      | 0.88                | 2.06                  | 2.909 (16)            | 162.2                            |
| C18–H18···O2WA <sup>x</sup>      | 0.95                | 2.55                  | 3.22 (3)              | 128.1                            |
| C18–H18···O2WB <sup>x</sup>      | 0.95                | 2.65                  | 3.40 (4)              | 135.9                            |
| C2A–H2A2···O16G <sup>xi</sup>    | 0.98                | 2.50                  | 3.13 (4)              | 122.1                            |

Notes: Symmetry codes: (i)  $x, y - 1, z$ ; (ii)  $x, y + 1, z$ ; (iii)  $x, y, z - 1$ ; (iv)  $x - 1, -y + 3/2, z - 1/2$ ; (v)  $-x + 1, -y + 1, -z + 1$ ; (vi)  $x - 1, -y + 1/2, z + 1/2$ ; (vii)  $-x, y - 1/2, -z + 1/2$ ; (viii)  $-x + 1, y - 1/2, -z + 1/2$ ; (ix)  $-x, -y + 1, -z + 1$ ; (x)  $x, -y + 1/2, z + 1/2$ ; (xi)  $x, y + 1, z - 1$ .

**Table S2.** Hydrogen-bond geometry of the compound (ThbH)<sub>3</sub>(H<sub>3</sub>O)[W<sub>10</sub>O<sub>32</sub>](H<sub>2</sub>O)<sub>7.5</sub> (**2**) (Å, °).

| <i>D</i> – <i>H</i> ··· <i>A</i> | <i>D</i> – <i>H</i> | <i>H</i> ··· <i>A</i> | <i>D</i> ··· <i>A</i> | <i>D</i> – <i>H</i> ··· <i>A</i> |
|----------------------------------|---------------------|-----------------------|-----------------------|----------------------------------|
| N21–H21···O6W                    | 0.86                | 2.10                  | 2.92 (2)              | 158                              |
| N9–H9···O16T                     | 0.86                | 1.86                  | 2.705 (13)            | 168                              |
| C27–H27A···O26T                  | 0.96                | 2.51                  | 3.21 (2)              | 129                              |
| C27–H27C···O23 <sup>i</sup>      | 0.96                | 2.31                  | 3.24 (2)              | 163                              |
| N19–H19···O1W                    | 0.86                | 1.82                  | 2.668 (16)            | 170                              |
| C23–H07A···O2W                   | 0.96                | 2.58                  | 3.52 (3)              | 166                              |
| C23–H07B···O6 <sup>iv</sup>      | 0.96                | 2.28                  | 3.18 (2)              | 156                              |
| C17–H17A···O16T                  | 0.96                | 2.44                  | 3.159 (15)            | 131                              |
| C17–H17B···O25 <sup>v</sup>      | 0.96                | 2.40                  | 3.222 (14)            | 144                              |
| C17–H17C···O14 <sup>vi</sup>     | 0.96                | 2.44                  | 3.271 (14)            | 145                              |
| N1–H1···O2T <sup>vii</sup>       | 0.86                | 2.03                  | 2.877 (13)            | 169                              |
| N29–H29···O2W                    | 0.86                | 1.87                  | 2.719 (18)            | 169                              |
| N11–H11···O31                    | 0.86                | 2.03                  | 2.858 (12)            | 161                              |
| C8–H8···O29 <sup>vi</sup>        | 0.93                | 2.21                  | 3.135 (13)            | 177                              |
| C7–H7A···O6T                     | 0.96                | 2.51                  | 3.223 (15)            | 131                              |
| C7–H7B···O12T <sup>vi</sup>      | 0.96                | 2.64                  | 3.171 (14)            | 115                              |
| C7–H7C···O22T <sup>vi</sup>      | 0.96                | 2.24                  | 3.188 (19)            | 170                              |

**Table S2.** *Cont.*

| <i>D</i> – <i>H</i> ··· <i>A</i>   | <i>D</i> – <i>H</i> | <i>H</i> ··· <i>A</i> | <i>D</i> ··· <i>A</i> | <i>D</i> – <i>H</i> ··· <i>A</i> |
|------------------------------------|---------------------|-----------------------|-----------------------|----------------------------------|
| C13–H13A···O1 <i>W</i>             | 0.96                | 2.55                  | 3.50 (2)              | 171                              |
| C28–H28···O6 <i>T</i> <sup>i</sup> | 0.93                | 2.42                  | 3.234 (18)            | 146                              |

Notes: Symmetry codes: (i)  $-x + 2, -y + 1, -z + 1$ ; (iv)  $x, y, z + 1$ ; (v)  $x - 1, y, z$ ; (vi)  $-x + 1, -y + 1, -z + 1$ ; (vii)  $-x + 2, -y, -z + 1$ .

**Table S3.** Hydrogen-bond geometry of the compound (ThbH)<sub>2</sub>[W<sub>6</sub>O<sub>19</sub>](H<sub>2</sub>O)<sub>2</sub> (**3**) (Å, °).

| <i>D</i> – <i>H</i> ··· <i>A</i>   | <i>D</i> – <i>H</i> | <i>H</i> ··· <i>A</i> | <i>D</i> ··· <i>A</i> | <i>D</i> – <i>H</i> ··· <i>A</i> |
|------------------------------------|---------------------|-----------------------|-----------------------|----------------------------------|
| N9–H9···O1 <i>W</i>                | 0.86                | 1.90                  | 2.741 (18)            | 166                              |
| N1–H1···O2 <i>T</i> <sup>ii</sup>  | 0.86                | 2.04                  | 2.894 (16)            | 175                              |
| C8–H8···O2 <i>T</i> <sup>iii</sup> | 0.93                | 2.20                  | 3.090 (19)            | 160                              |
| C3–H3C···O7 <sup>iv</sup>          | 0.96                | 2.37                  | 3.133 (19)            | 136                              |
| C7–H7A···O6 <i>T</i>               | 0.96                | 2.48                  | 3.19 (2)              | 131                              |

Notes: Symmetry codes: (ii)  $-x + 3/2, -y + 3/2, -z$ ; (iii)  $x, -y + 1, z + 1/2$ ; (iv)  $x + 1/2, y - 1/2, z$ .

## 5. BVS Calculations [3]

**Table S4.** Selected bond valence sums of the compound (GuaH)<sub>4</sub>[W<sub>10</sub>O<sub>32</sub>](H<sub>2</sub>O)<sub>4</sub> (**1**).

| Atom No. | Bond valence Sum | % Deviation from assumed valence state |
|----------|------------------|----------------------------------------|
| W1       | 5.933            | 1                                      |
| W2       | 6.003            | 0                                      |
| W3       | 6.051            | 1                                      |
| W4       | 6.077            | 1                                      |
| W5       | 6.227            | 4                                      |
| O1       | 1.698            | 15                                     |
| O2       | 1.775            | 11                                     |
| O3       | 1.819            | 9                                      |
| O4       | 1.839            | 8                                      |
| O5       | 1.910            | 5                                      |
| O6       | 1.743            | 13                                     |
| O7       | 1.807            | 10                                     |
| O8       | 1.921            | 4                                      |
| O9       | 2.033            | 2                                      |
| O10      | 1.812            | 9                                      |
| O11      | 1.973            | 1                                      |
| O12      | 1.788            | 11                                     |
| O13      | 1.966            | 2                                      |
| O15      | 2.106            | 5                                      |
| O16      | 2.167            | 8                                      |

**Table S5.** Selected bond valence sums of the compound  $(\text{ThbH})_3(\text{H}_3\text{O})[\text{W}_{10}\text{O}_{32}](\text{H}_2\text{O})_{7.5}$  (**2**).

| Atom No. | Bond valence Sum | % Deviation from assumed valence state |
|----------|------------------|----------------------------------------|
| W1       | 6.143            | 2                                      |
| W2       | 6.264            | 4                                      |
| W3       | 5.960            | 1                                      |
| W4       | 6.155            | 3                                      |
| W5       | 6.075            | 1                                      |
| W6       | 6.190            | 3                                      |
| W7       | 6.091            | 2                                      |
| W8       | 6.025            | 0                                      |
| W9       | 6.174            | 3                                      |
| W10      | 6.107            | 2                                      |
| O1       | 1.769            | 12                                     |
| O2       | 1.954            | 2                                      |
| O3       | 1.919            | 4                                      |
| O4       | 1.906            | 5                                      |
| O5       | 1.898            | 6                                      |
| O6       | 1.862            | 7                                      |
| O7       | 2.000            | 0                                      |
| O8       | 1.741            | 13                                     |
| O9       | 2.017            | 1                                      |
| O10      | 1.717            | 14                                     |
| O11      | 2.011            | 1                                      |
| O12      | 2.122            | 6                                      |
| O13      | 2.006            | 0                                      |
| O14      | 1.812            | 9                                      |
| O15      | 2.104            | 5                                      |
| O16      | 1.759            | 12                                     |
| O17      | 2.108            | 5                                      |
| O18      | 1.832            | 8                                      |
| O19      | 2.019            | 1                                      |
| O20      | 1.736            | 13                                     |
| O21      | 2.001            | 0                                      |
| O22      | 2.121            | 6                                      |
| O23      | 1.769            | 12                                     |
| O24      | 2.025            | 1                                      |
| O25      | 1.981            | 1                                      |
| O26      | 1.754            | 12                                     |
| O27      | 1.947            | 3                                      |
| O28      | 1.905            | 5                                      |
| O29      | 1.900            | 5                                      |
| O30      | 1.919            | 4                                      |
| O31      | 1.698            | 15                                     |
| O32      | 1.872            | 6                                      |

**Table S6.** Selected bond valence sums of the compound (ThbH)<sub>2</sub>[W<sub>6</sub>O<sub>19</sub>](H<sub>2</sub>O)<sub>2</sub> (**3**).

| Atom No. | Bond valence Sum | % Deviation from assumed valence state |
|----------|------------------|----------------------------------------|
| W1       | 6.145            | 2                                      |
| W2       | 6.201            | 3                                      |
| W3       | 6.228            | 4                                      |
| W4       | 6.109            | 2                                      |
| O1       | 1.817            | 9                                      |
| O2       | 1.964            | 2                                      |
| O3       | 1.974            | 1                                      |
| O4       | 1.992            | 0                                      |
| O5       | 2.025            | 1                                      |
| O6       | 1.974            | 1                                      |
| O7       | 1.852            | 7                                      |
| O8       | 1.326            | 34                                     |
| O9       | 1.984            | 1                                      |
| O10      | 1.962            | 2                                      |
| O11      | 1.857            | 7                                      |

## References

1. Palmer, D.J.; Dickens, P.G. Tungsten dioxide: Structure refinement by powder neutron diffraction. WO<sub>2</sub>-powder diffraction data. *Acta Cryst. B* **1979**, *35*, 2199–2201.
2. Vogt, T.; Paulus, H.; Fuess, H.; Müller, G. The crystal structure of HAlSi<sub>2</sub>O<sub>6</sub> with a keatite-type framework. H<sub>0.52</sub>D<sub>0.48</sub>(AlSi<sub>2</sub>)O<sub>6</sub>-powder diffraction data. *Z. Kristallogr.* **1990**, *190*, 7–18.
3. Wills, A.S. VaList-Program. Available online: <https://dl.dropboxusercontent.com/u/8933134/Website/Site/Software/Software.html> (accessed on 15 February 2014).

© 2014 by the authors; licensee MDPI, Basel, Switzerland. This article is an open access article distributed under the terms and conditions of the Creative Commons Attribution license (<http://creativecommons.org/licenses/by/3.0/>).
